# Supplementary material
Source: PubMed Central journal article supplement (PMC5437245)

**Suppl. Fig. 1 . The HOOK is intrinsically disordered in solution and does not interact with  $\beta_{1a}$ .** (a) The primary sequence of the HOOK<sub>185–255</sub> with an N-terminal hexahistidine tag. (b) CD spectra of the HOOK (7  $\mu$ M) and  $\beta_{1a}$  NH (2  $\mu$ M) in isolation and in combination ( $\beta_{1a}$ -HOOK at 7  $\mu$ M and  $\beta_{1a}$ -SH3/GK at 2  $\mu$ M). Spectra were recorded at 20°C in 20 mM phosphate buffered at pH 7.0 in a 1 mm quartz cuvette. Spectra are an average of three scans and are buffer baseline corrected. The mathematical sum (Matsum) of  $\beta_{1a}$ -HOOK and  $\beta_{1a}$ -SH3/GK NH spectra match the spectrum of HOOK and  $\beta_{1a}$  NH in combination. The difference (difference) between the mathematical sum and combination spectrum is also shown. (c) <sup>15</sup>N-HSQC spectrum of HOOK resuspended in 20 mM phosphate buffer pH 5.0 obtained at 298 K. <sup>15</sup>N-HSQC titrations were conducted at 298 K in 20 mM phosphate pH 7.0.

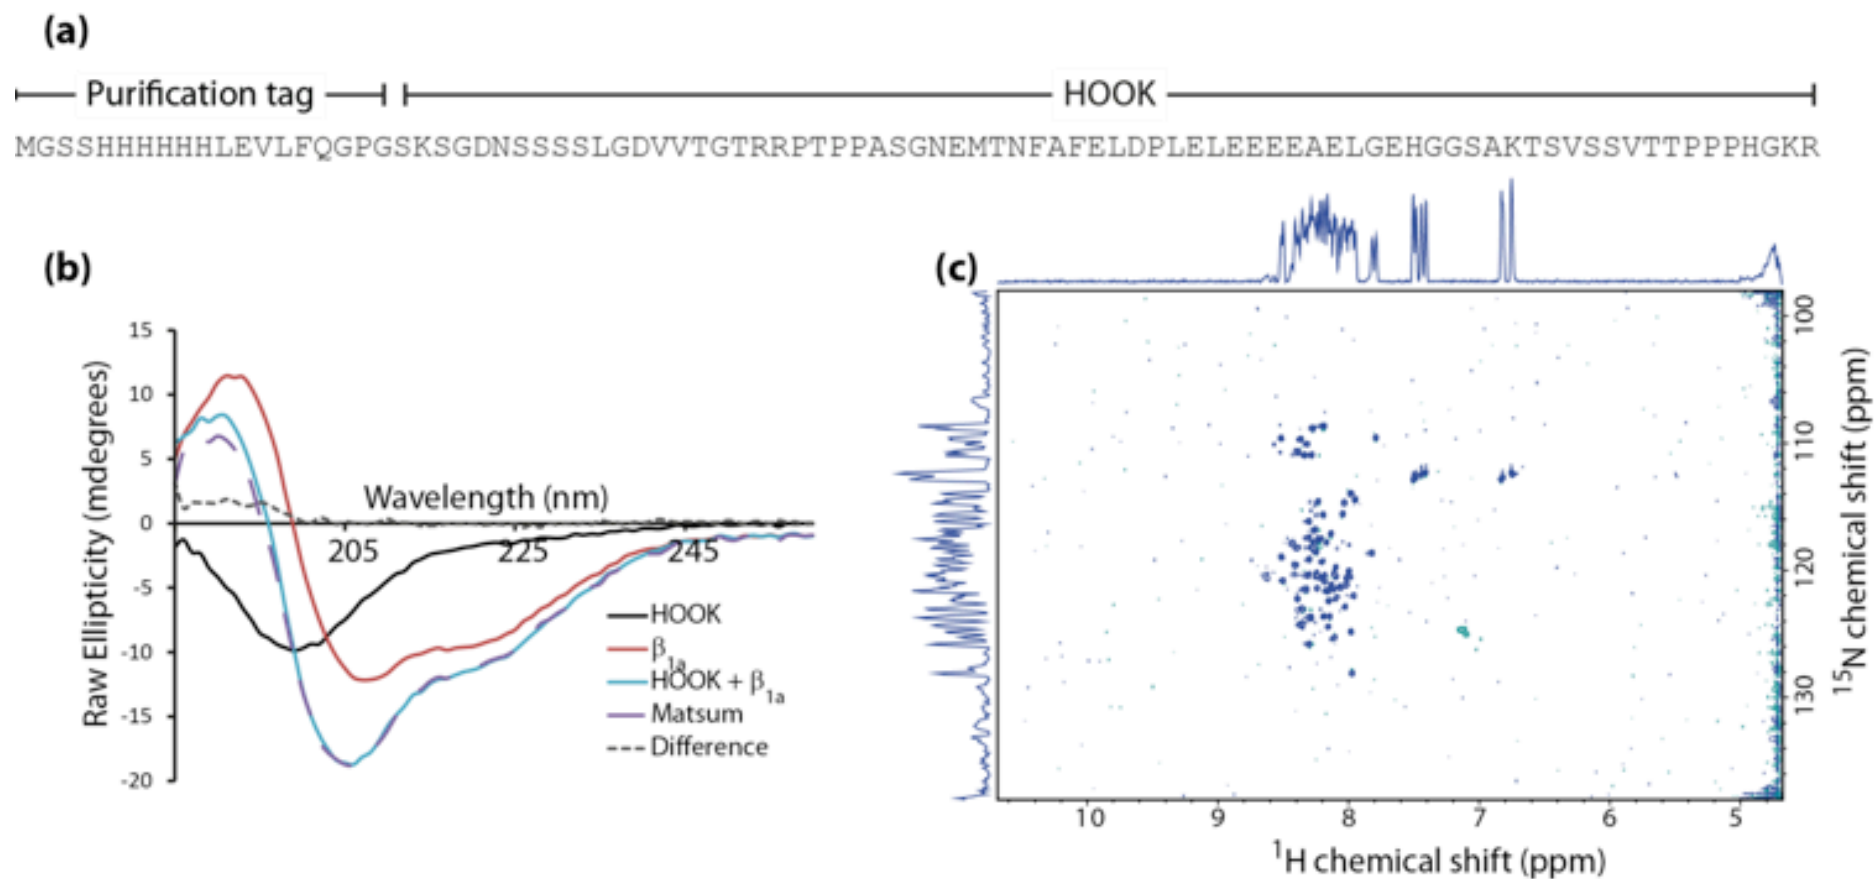

**Suppl. Fig. 2 AID influences interactions** between helix 9 and the SH3 domain. (a)  $\beta_{1a}$  (b)  $\beta_{2a}$  without AID (PDB ID: 1T0H white cartoon with red sticks) and in complex with AID (PDB ID: 1T0J cyan cartoon with blue sticks), (c)  $\beta_{2a}$  without AID (PDB ID: 13TL, light pink) in complex with AID (PDB ID: 13TS, white) (d)  $\beta_3$  without AID (PDB ID: 1VYU, gold) and in complex with AID (PDB ID: 1VYT, white).

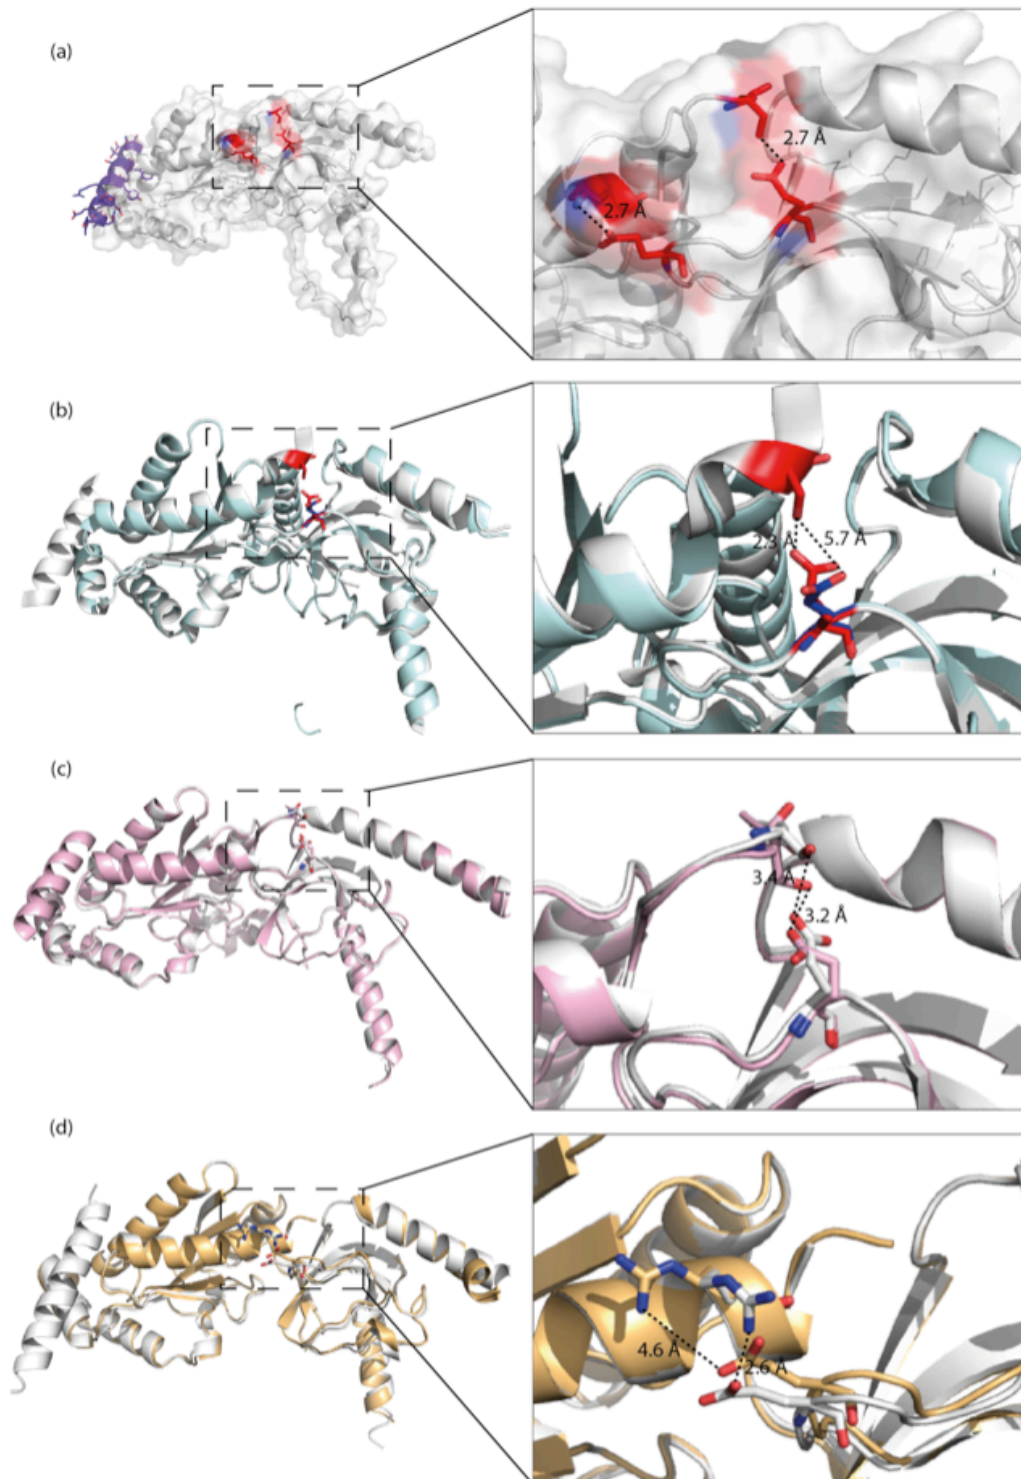

Supplement: 10.1074_M116.763896_jbc.M116.763896-1.pdf [file 10.1074_M116.763896_jbc.M116.763896-1.pdf]
